# Supplementary material for: High-resolution characterization of gene function using single-cell CRISPR tiling screen
Source: PubMed Central journal article supplement (PMC8249386; doi:10.1038/s41467-021-24324-0), 2021-07-01
Supplement: 41467_2021_24324_MOESM1_ESM.pdf [file 41467_2021_24324_MOESM1_ESM.pdf]

**sc-Tiling: High-resolution characterization of gene function using single-cell CRISPR tiling screen**

Yang et al.

Supplementary Figures 1 – 12

Supplementary Table 1 – 2

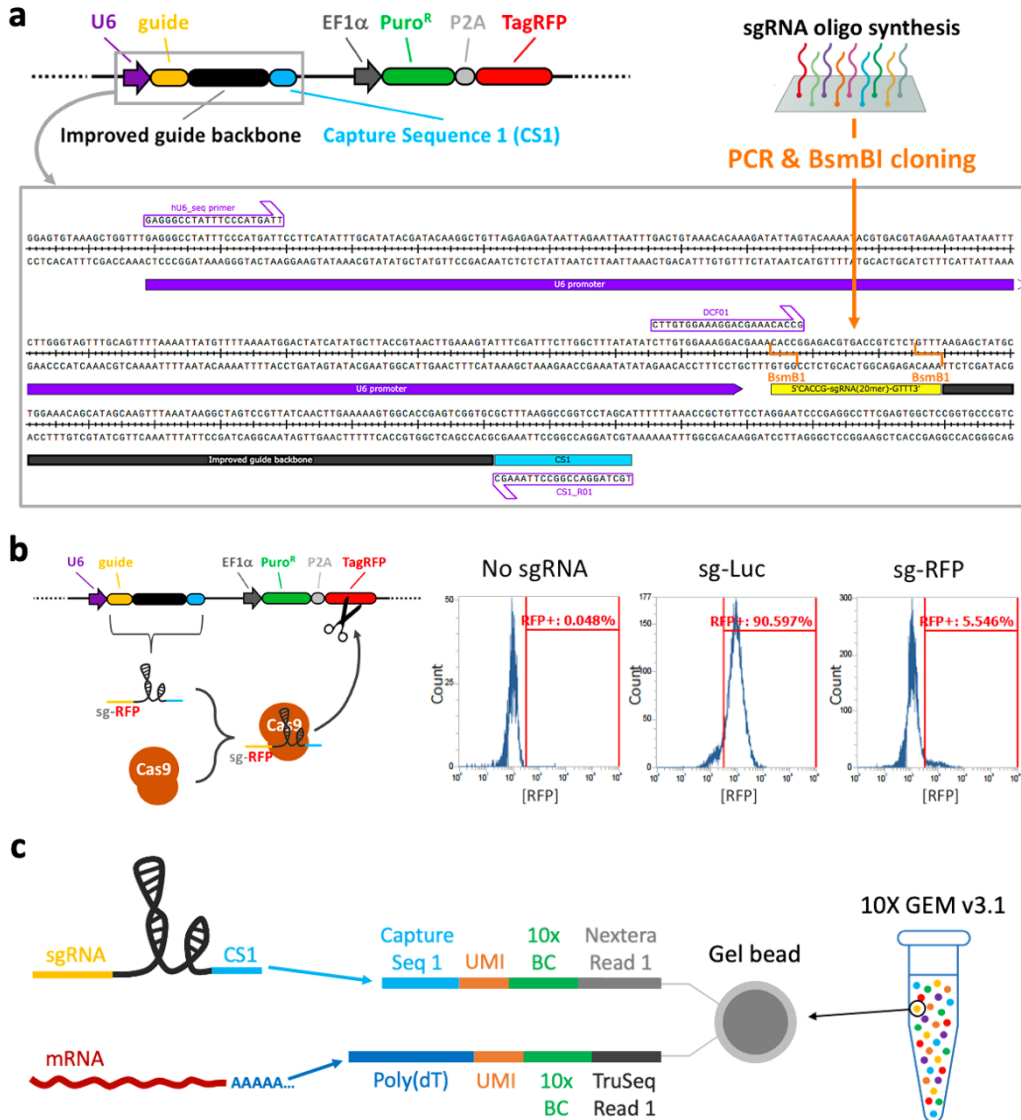

**Supplementary Figure 1. Schematic outline of the single-cell CRISPR screen system.** (a) Sequence map of the pUCS1EPR vector expressing a CS1-capturable sgRNA together with a puromycin-resistant gene (Puro<sup>R</sup>) and a TagRFP fluorescent protein. Primers for Sanger (hU6\_seq) and Illumina (DCF01 and CS1\_R01) sequencing are listed. (b) Validation of CRISPR editing efficiency of the CS1-capturable sgRNA in Cas9-expressing cells using an RFP inactivation assay. (c) Cartoon illustration of the CS1 and poly(dT) capture mechanisms for single-cell CRISPR and mRNA sequencing.

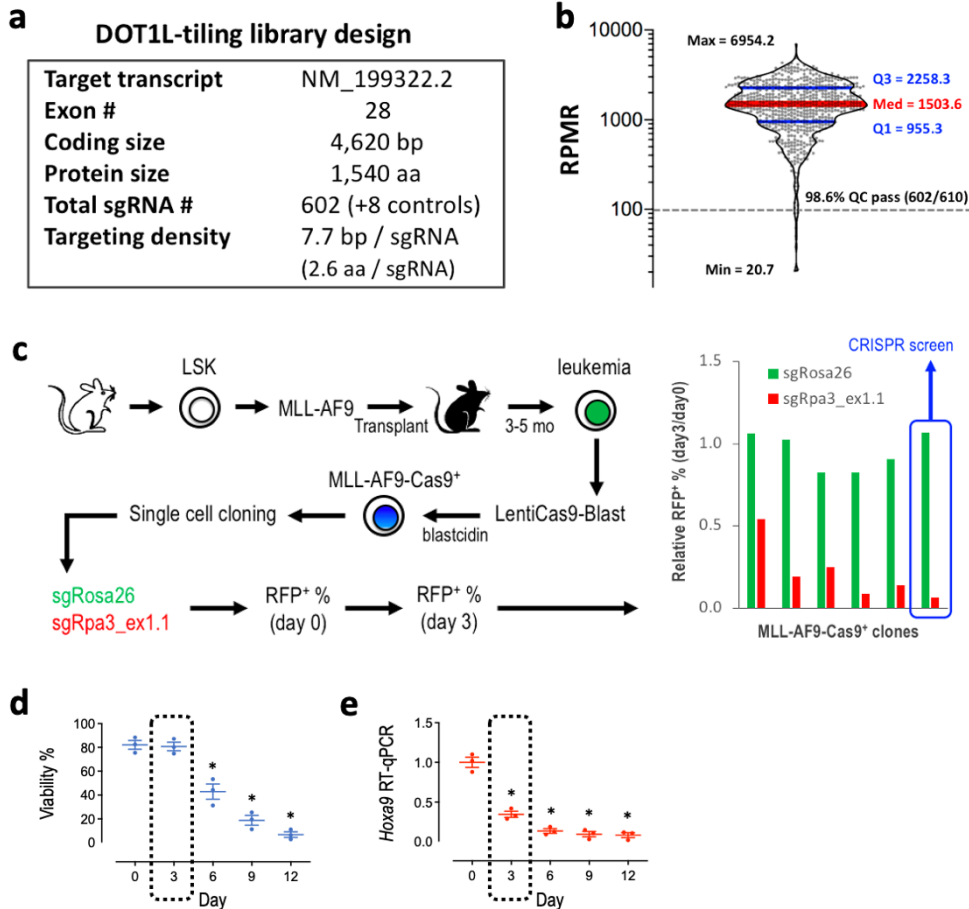

**Supplementary Figure 2. CRISPR gene tiling screen in MLL-AF9 leukemia cells.** (a) Specifications of the DOT1L-tiling CRISPR library targeting the coding exons of mouse *Dot1l*. (b) Distribution of individual sgRNA frequencies (reads per million reads; RPM) in the DOT1L-tiling CRISPR library. 98.6 % of sgRNA passed the QC by exhibiting greater than 100 RPM. (c) Establishment of monoclonal Cas9-expressing MLL-AF9 leukemia cells with high CRISPR editing efficiency. The sgRNA targeting *Rosa26* (green; negative control) and *Rpa3* (red; positive control) were reported by Shi et al.<sup>1</sup> (Supplementary Figure 3). (d) Cell viability and (e) *Hoxa9* (a DOT1L-driven gene) expression level of MLL-AF9-Cas9<sup>+</sup> cells transduced with a sgRNA targeting the KMT core. Data represent mean  $\pm$  SEM of a triplicate experiment. \* $P < 0.01$  by two-sided Student's t-test compared to day 0. Day 3 post-transduction (dotted box) was selected for sc-Tiling screen to avoid cell death signature influencing the transcriptomic analysis.

**a** Poly(dT) captured mRNA library

|                       |             |
|-----------------------|-------------|
| Number of reads       | 185,270,701 |
| Valid barcodes        | 96.2%       |
| Q30 – Barcode         | 95.9%       |
| Q30 – mRNA            | 92.7%       |
| Q30 – Index           | 94.2%       |
| Q30 – UMI             | 93.3%       |
| Mean reads per cell   | 26,350      |
| Median genes per cell | 2,935       |
| Total genes detected  | 15,921      |
| Median UMI # per cell | 11,341      |

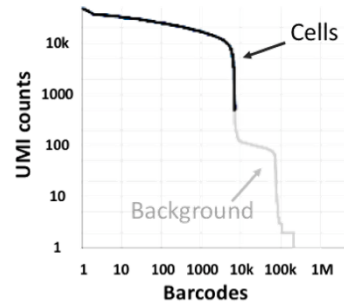

Alignment (mm10)

|                   |       |
|-------------------|-------|
| Genome            | 92.0% |
| Exons             | 76.0% |
| Introns           | 12.2% |
| Intergenic region | 3.8%  |
| Antisense         | 2.0%  |

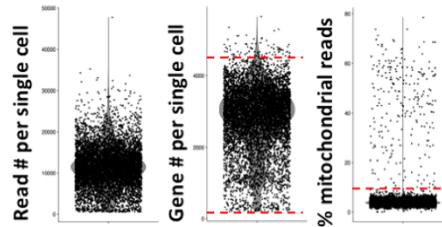

**b** CS1 captured sgRNA library

|                     |           |
|---------------------|-----------|
| Number of reads     | 8,910,124 |
| Valid barcodes      | 84.2%     |
| Q30 – Barcode       | 96.7%     |
| Q30 – sgRNA         | 94.1%     |
| Q30 – Index         | 91.7%     |
| Q30 – UMI           | 96.7%     |
| Mean reads per cell | 1,267     |
| Cells with 1 sgRNA  | 4,362     |
| Cells with 2 sgRNA  | 527       |
| Cells with 3+ sgRNA | 54        |

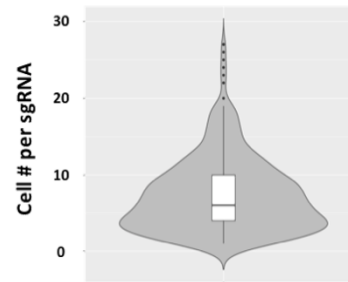

**Supplementary Figure 3. Summary of sequencing specifications of sc-Tiling mouse *Dot1l* gene.** Single-cell sequencing QC report of (a) poly(dT)-captured mRNA library and (b) CS1-captured sgRNA library. Box represents the 25th, 50th, and 75th percentiles, and the whisker indicates 1.5 interquartile range.

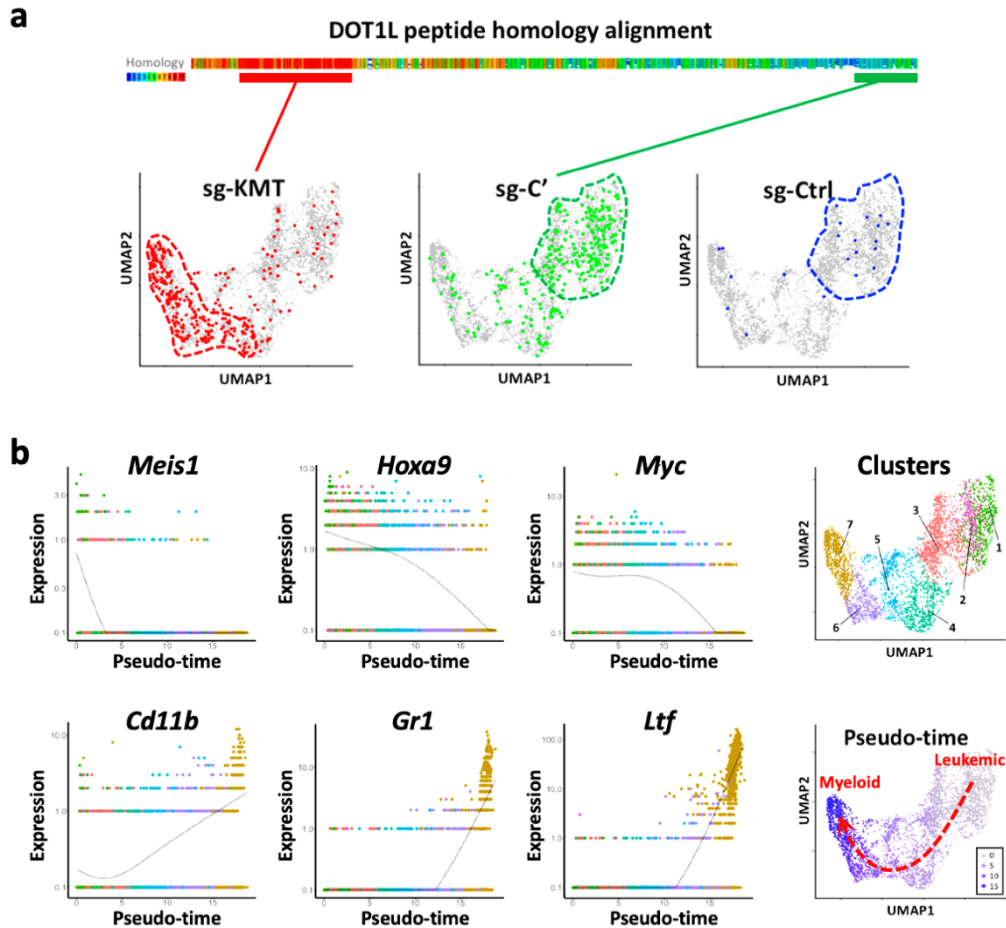

**Supplementary Figure 4. Distribution and gene expression pattern of sc-Tiling single cells.** (a) Distribution of single cells harboring sgRNAs targeting the KMT core (red; 56 sgRNAs), C-terminus (green; 54 sgRNAs), or negative controls (blue; 5 sgRNAs) on UMAP. Peptide sequence homology was analyzed using PRALINE multiple sequence alignment<sup>2</sup> at <http://www.ibi.vu.nl/programs/pralinewww>. (b) Association of the pseudo-time projection with the progressive reduction of leukemia-associated genes (*Meis1*, *Hoxa9*, *Myc*) or induction of myeloid-differentiation genes (*Cd11b*, *Gr1*, *Ltf*). Colored dots indicate single cells in each cell cluster (1–7) identified on UMAP (upper-right). Annotation of pseudo-time projection (bottom-right; purple gradient) indicates clustering of the leukemic (right) vs. myeloid (left) cells on UMAP.

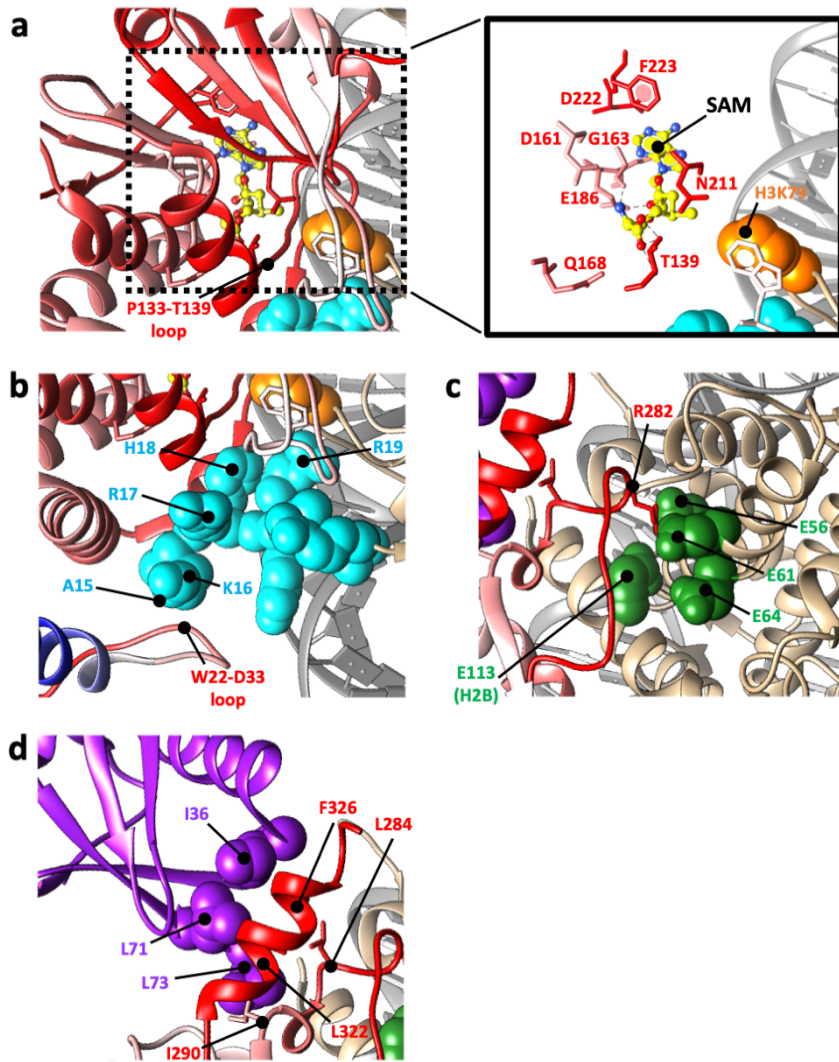

**Supplementary Figure 5. Three-dimensional annotation of DOT1L sc-Tiling.** Mapping of smoothed pseudo-time score to a cryo-EM structural model of “active state” DOT1L (residues M1–P332) bound to a ubiquitylated nucleosome (PDB ID: 6NQA)<sup>3</sup>, as shown in Fig. 1H. (a) DOT1L catalytic pocket nearby histone H3K79 (orange spheres; methylation target of DOT1L) including the DOT1L residues directly interacting with the enzymatic substrate SAM (colored sticks). (b) DOT1L W22–D33 loop stabilizes the interaction with histone H4 N-terminal tail (cyan spheres; H4 residues A15–R19 are labeled). (c) DOT1L R282 loop interacts with an H2A/H2B acidic patch (green spheres; histone H2A E56/E61/E64 and H2B E113). (d) DOT1L T320–K330 helix (L322 and F326) and nearby residues (L284 and I290) interact with H2BK120 conjugated to ubiquitin (purple). The DOT1L contact points I36/L71/L73 on ubiquitin are labeled as purple spheres. Histones (gold; including H2A, H2B, H3, and H4) and DNA (grey) are shown.

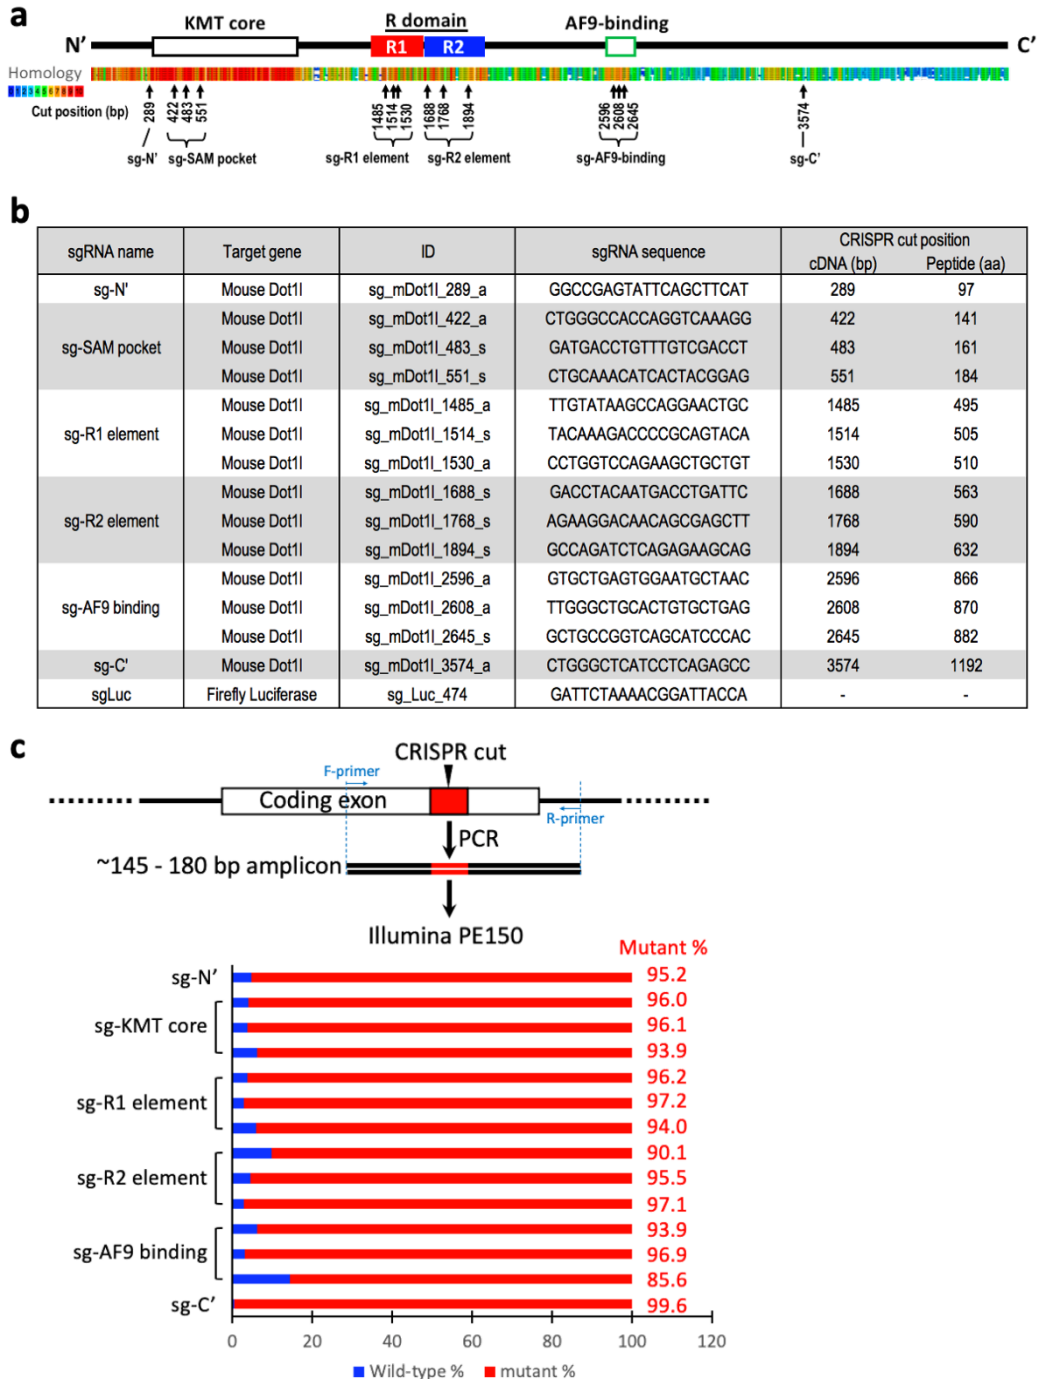

**Supplementary Figure 6. Individual sgRNAs targeting mouse Dot1l coding regions for functional validation.** (a) Schematic outline of the mouse DOT1L protein domains, peptide homology (by PRALINE multiple sequence alignment), and select sgRNA targeting positions. (b) Specifications of individual sgRNAs targeting indicated regions of mouse *Dot1l* and *Firefly luciferase*. (c) CRISPR editing efficiency of the selected sgRNAs (average  $94.8 \pm 3.4\%$ ) in MLL-AF9-Cas9<sup>+</sup> cells at day 3 after sgRNA transduction.

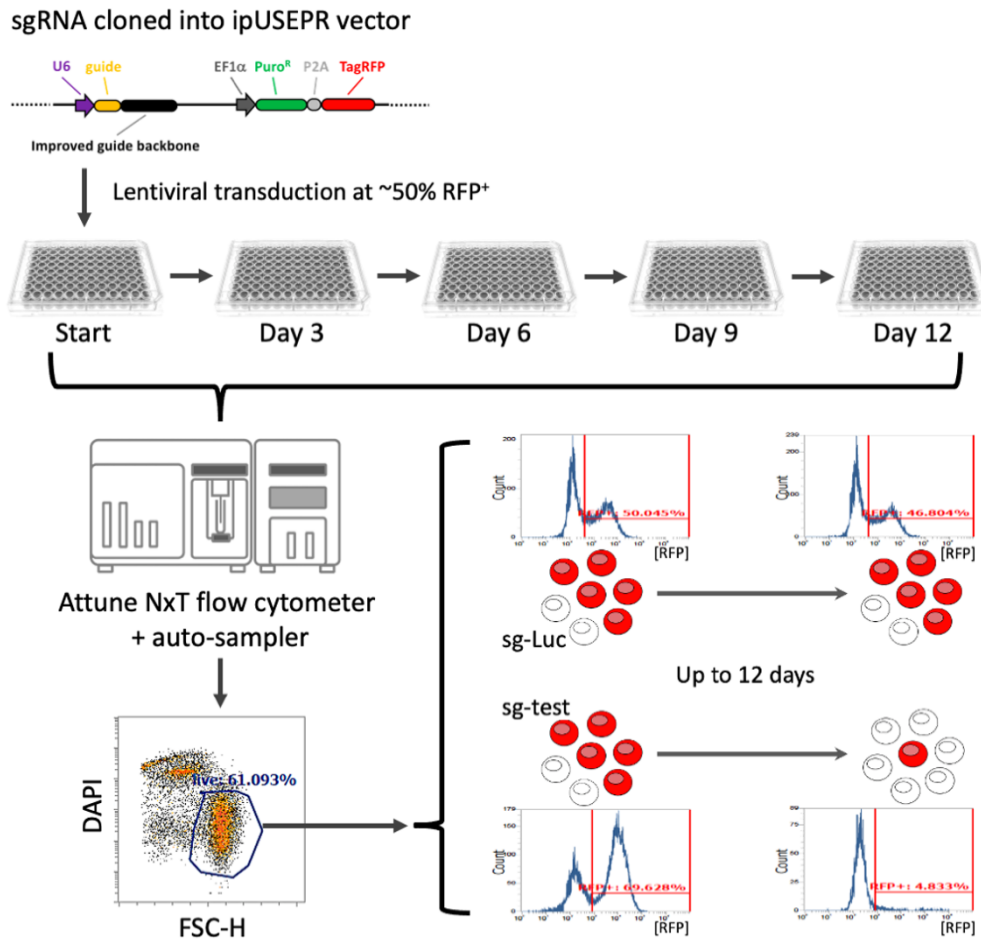

Supplementary Figure 7. Schematic outline of the RFP flow cytometric growth competition assay.



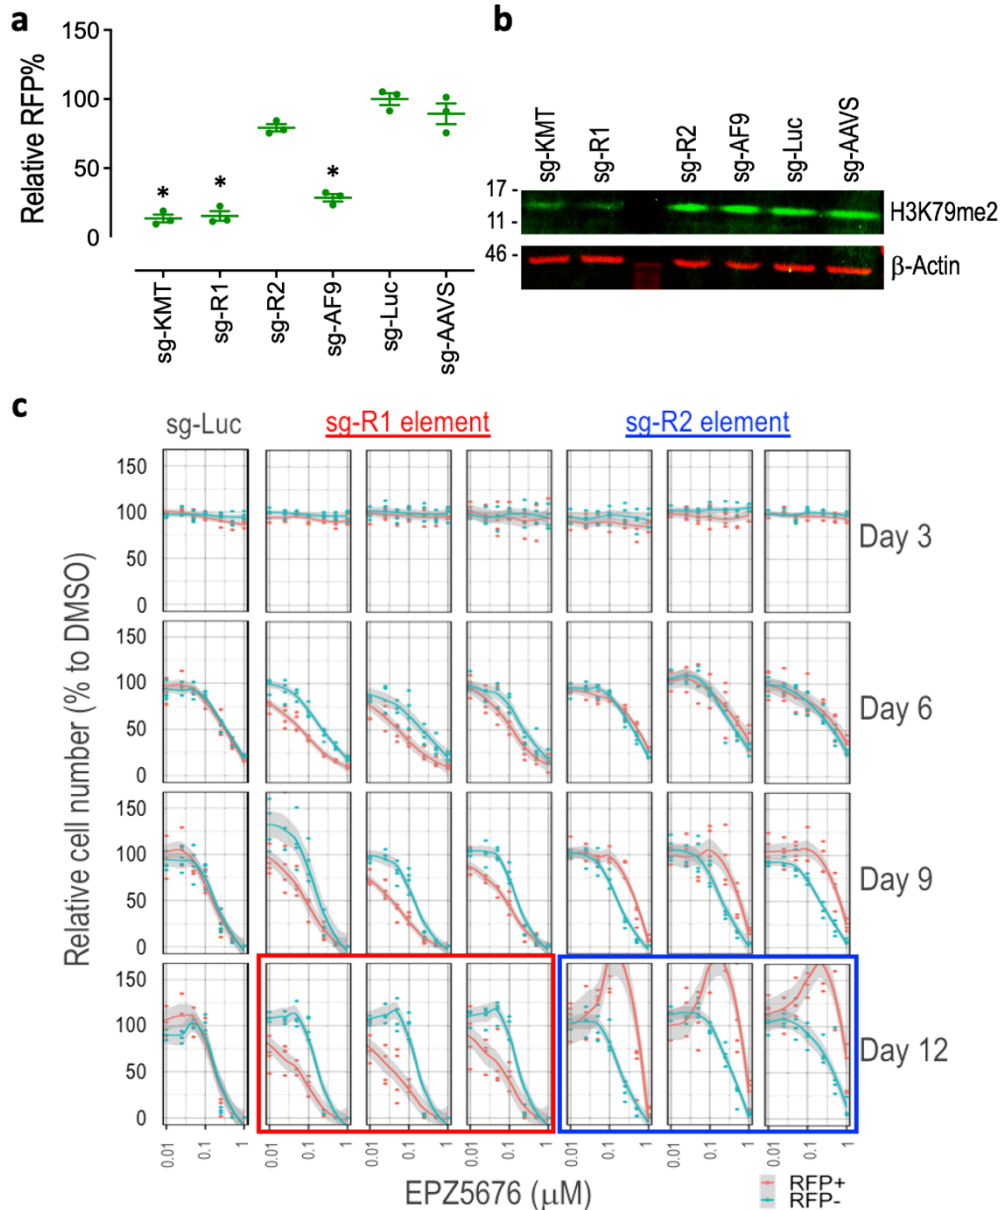

**Supplementary Figure 8. Effect of individual sgRNAs targeting the R1 or R2 elements of DOT1L in response to EPZ5676 in MLL-AF9-Cas9<sup>+</sup> leukemia cells.** (a) Relative RFP% and (b) Western blot images of H3K79me2 (green) and  $\beta$ -Actin (red) in MLL-AF9-Cas9<sup>+</sup> cells expressing indicated sgRNAs (one sgRNA per domain). A sgRNA targeting the AAVS safe-harbor locus (sg-AAVS; 5'-GGGGCCACTAGGGACAGGAT-3') performs similarly to sg-Luc. (c) Number of RFP<sup>+</sup> (sgRNA transduced) and RFP<sup>-</sup> (non-transduced) cells were measured by flow cytometer (Attune NxT, ThermoFisher). Data represent (a) mean  $\pm$  SEM of a triplicate experiment. \*P < 0.01 by two-sided Student's t-test compared to sg-Luc. (c) Observed values and mean  $\pm$  95% confidence interval of a quadruplicate experiment.

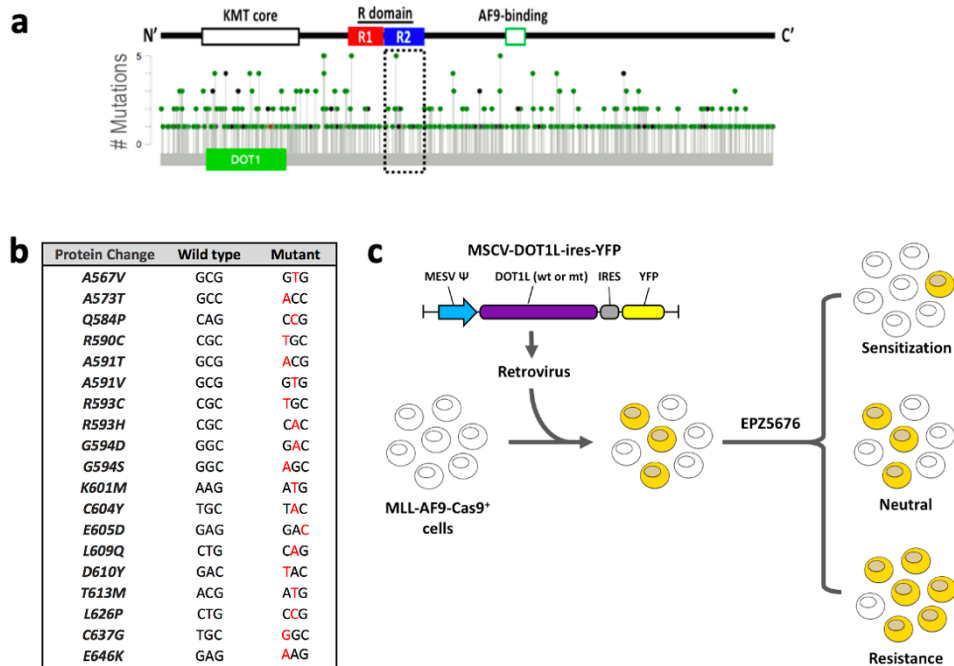

**Supplementary Figure 9. Clinically observed *DOT1L* variant alleles in the R2 element.** (a) A total of 779 missense *DOT1L* variants were identified in cBioPortal database (missense mutations labeled as green in the lollipop). (b) Table shows a total of 19 missense variants observed in the R2 element (residues A558–C662). (c) Mutation of *DOT1L* cDNAs and schematic outline of the YFP flow cytometric growth competition assay.

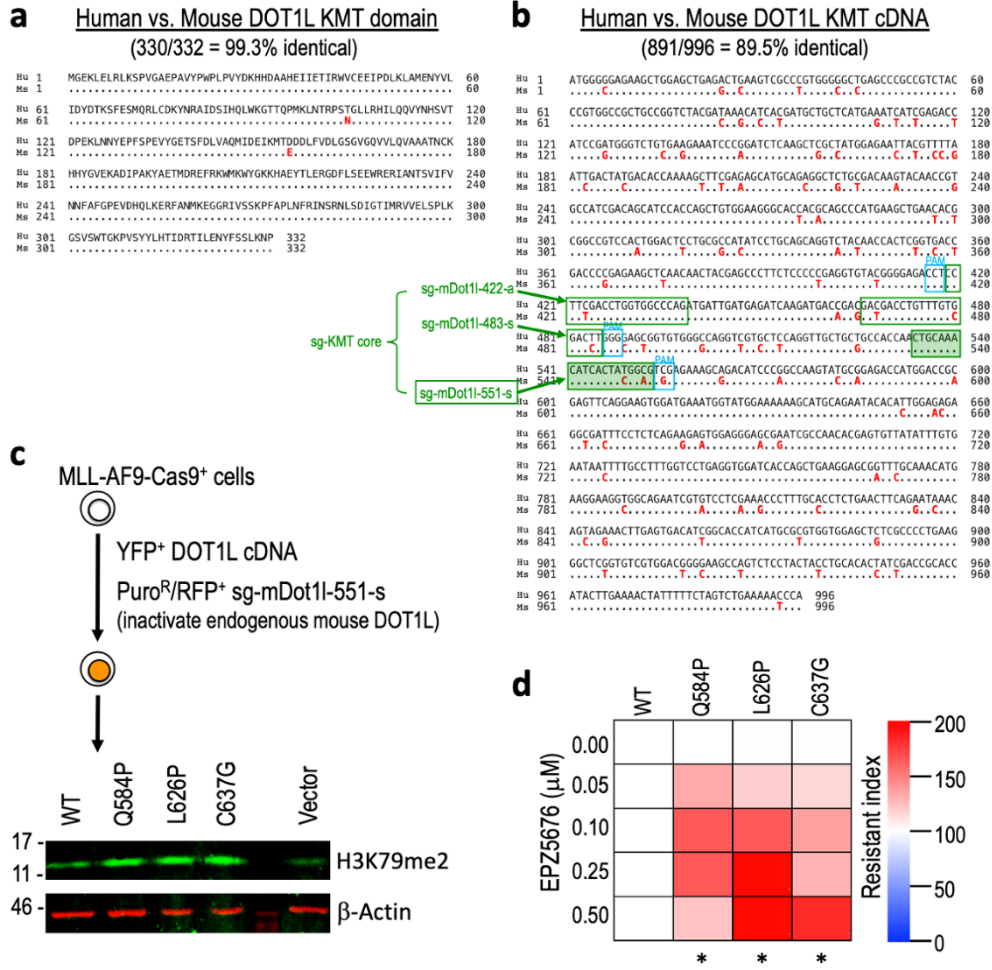

**Supplementary Figure 10. Validation of drug-resistant *DOT1L* cDNA in MLL-AF9 cells missing an endogenous *DOT1L* activity.** Comparison of (a) amino acid and (b) coding sequences between human and mouse *DOT1L* in the KMT domain (M1 – P332) showing highly conserved peptide (99.3% identical) but more degenerated DNA sequences (89.5% identical). One of the KMT core sgRNAs (sg-mDot1l-551-s) was predicted only targeting the endogenous mouse *DOT1L* (human *DOT1L* contains two nucleotide mismatches near the 3' end of sgRNA, plus one alternation in the PAM sequence). (c) Western blot images of H3K79me2 (green) and β-Actin (red) and (d) heatmap showing EPZ5676 resistant index of *DOT1L*-knockout MLL-AF9 leukemia cells transduced with wild-type (WT), Q584P, L626P, or C637G human *DOT1L* cDNA. Data represent the averaged values of a triplicate experiment. \*Significantly ( $P < 0.01$  by two-sided Student's t-test) higher resistance compared to wild-type at 0.5 μM EPZ5676.

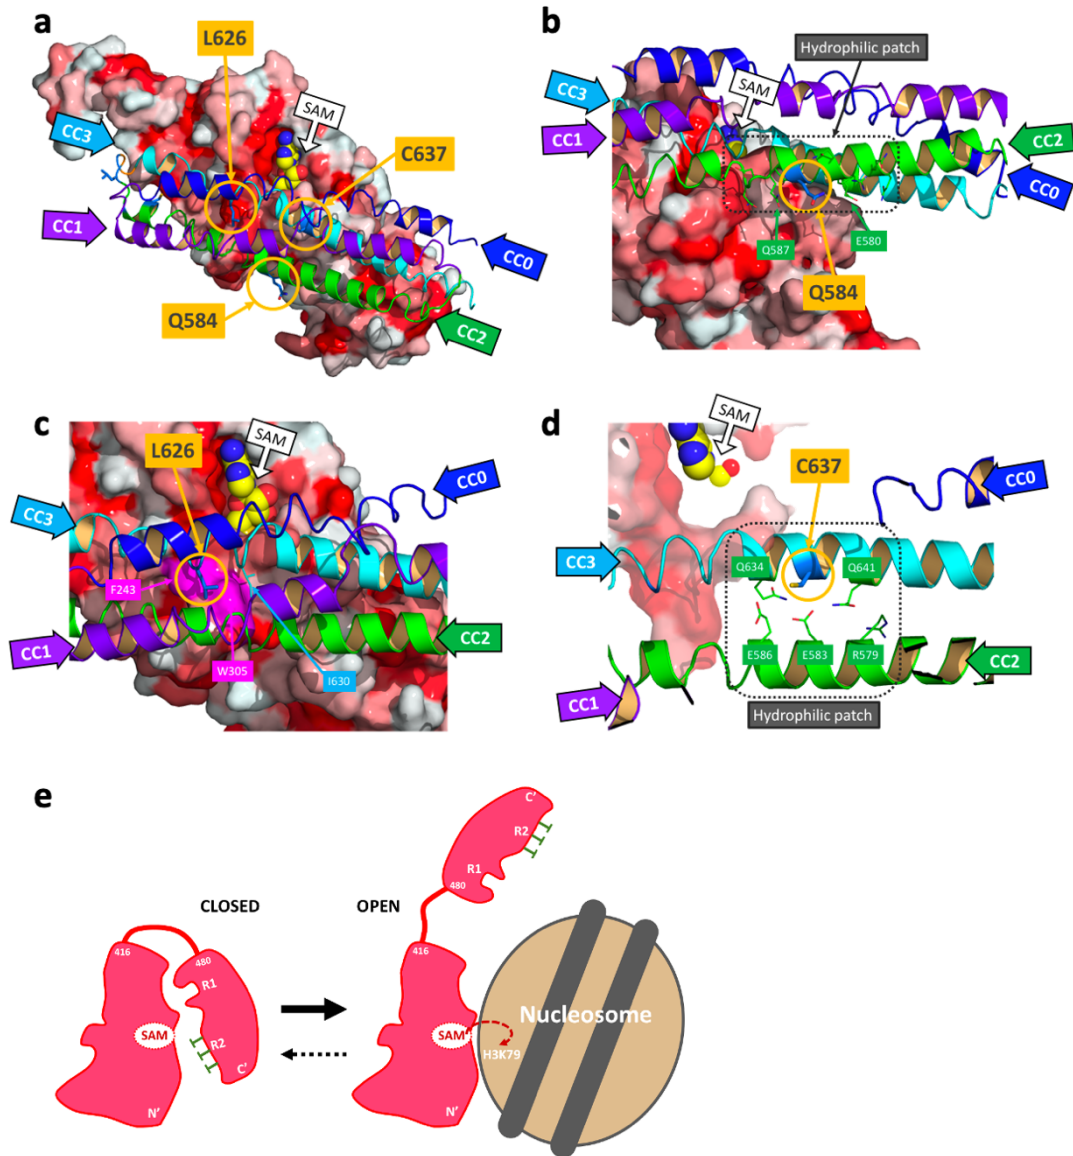

**Supplementary Figure 11. Binding model of the DOT1L R domain with the KMT domain and drug-resistant mutations.** (a) The DOT1L KMT domain (residues M1–P332; PDB ID 3QOW) is shown as surface with hydrophobic residues colored in red. The enzymatic substrate SAM is displayed as spheres. The R domain is depicted as a cartoon shown with CC0 (blue), CC1 (purple), CC2 (green), and CC3 (cyan) helices. The residues identified as drug-resistant mutations (Q584P, L626P, and C637G) in the R2 element (CC2 and CC3) are shown as colored sticks and their contact residues are displayed as lines. (b) Q584 is located in the center of a hydrophilic patch (dashed-line box) on both CC2 (Q576, Q577, R579, E580, Q581, E583, Q587, D588, N589) and CC3 (Q634, Q641) helices. Q584 stabilizes the CC2 helical structure via hydrophilic interactions with its neighboring residues E580 and Q587. Mutation of Q584 to a hydrophobic proline (Q584P), which will either break or kink the helix, will destabilize the CC2 helix structure and weaken the interaction between CC2 and CC3. (c) L626 is located in the middle of the CC3 helix and is a key residue by which the R domain interacts with the KMT domain (F243 and W305; shown as a pink patch) via hydrophobic interaction. It also stabilizes the CC3 helix by hydrophobic interaction

with I630. As proline tends to break helical structures, the L626P mutation may disrupt the CC3 helical structure and weaken the interaction between the R domain and KMT domain. (d) C637 is located in the center of a hydrophilic patch composed of Q634/C637/Q641 in CC3 and R579/E583/E586 in CC2 (dashed-line box) that stabilizes the helical structure and establishes the CC2/CC3 interaction. Mutation of C637 to a glycine (C637G) may disrupt the CC3 helical structure (due to the high conformational flexibility of glycine) and the interaction between CC2 and CC3. (e) Cartoon representation of the missense mutations (green) in the DOT1L R2 element, which favor the transition from a closed (left) to an open (right) state of the DOT1L KMT domain, thereby facilitating DOT1L-to-nucleosome interactions and H3K79 methylation.

**a**

| Cell Line        | Tissue Type Classification         | Variant Classification | Reference Allele | Tumor Seq Allele | Protein Change |
|------------------|------------------------------------|------------------------|------------------|------------------|----------------|
| DND41            | HAEMATOPOIETIC_AND_LYMPHOID_TISSUE | Silent                 | G                | A                | L578L          |
| MFE319           | ENDOMETRIUM                        | Silent                 | C                | T                | L559L          |
| KARPAS45         | HAEMATOPOIETIC_AND_LYMPHOID_TISSUE | Silent                 | G                | A                | E639E          |
| NCIH513          | PLEURA                             | Silent                 | C                | G                | L592L          |
| RCCFG2           | KIDNEY                             | Missense               | G                | A                | <b>G594S</b>   |
| PECAPJ34CLONEC12 | UPPER_AERODIGESTIVE_TRACT          | In_Frame_Del           | ACA              | -                | N562del        |

**b**

| Residue Variant | Variant ID   | Location   | Alleles | Evidence                                     |
|-----------------|--------------|------------|---------|----------------------------------------------|
| <b>A567V</b>    | rs1470399067 | 19:2213888 | C/T     | Frequency~gnomAD                             |
| <b>R590C</b>    | rs371142941  | 19:2213956 | C/T     | Frequency~ESP~ExAC~TOPMed~gnomAD             |
| <b>A591T</b>    | rs776577348  | 19:2213959 | G/A     | Frequency~ExAC~TOPMed~gnomAD                 |
| <b>A591V</b>    | rs376751030  | 19:2213960 | C/T     | Frequency~ESP~ExAC~TOPMed~gnomAD             |
| <b>R593C</b>    | rs200802307  | 19:2213965 | C/T     | Frequency~1000Genomes~ESP~ExAC~TOPMed~gnomAD |
| <b>R593H</b>    | rs370589055  | 19:2213966 | G/A     | Frequency~ESP~ExAC~gnomAD                    |
| <b>G594S</b>    | rs376032475  | 19:2213968 | G/A     | Frequency~ExAC~TOPMed~gnomAD                 |
| <b>T613M</b>    | rs756254147  | 19:2214510 | C/T     | Frequency~ExAC~TOPMed~gnomAD                 |

**Supplementary Figure 12. Detection of cBioPortal observed DOT1L R2 variants in human cancer cell lines and population genomics databases.** (a) DOT1L missense variant G594S reported in this study was also detected in Cancer Cell Line Encyclopedia (CCLE; BROAD Institute; total 1,457 human cell lines). (b) Eight out of 19 missense DOT1L variants discussed in this study were observed in the Single Nucleotide Polymorphism Database (dbSNP; including genomic information from 1000Genome, ExAC, TOPMed, GnomAD, GoESP) as potential germline variants in the human population.

| Protein Change | Study                               | Sample ID                         | Cancer Type                       | Mutation Type | Allele Freq |
|----------------|-------------------------------------|-----------------------------------|-----------------------------------|---------------|-------------|
| A567V          | <a href="#">Uterine Corpus E...</a> | <a href="#">TCGA-B5-A3FC-01</a>   | Uterine Endometrioid Carcinoma    | Missense      | 0.29        |
| A573T          | <a href="#">MSK-IMPACT Clini...</a> | <a href="#">P-0010275-T01-IM5</a> | Rectal Adenocarcinoma             | Missense      | 0.15        |
| Q584P          | <a href="#">MSK-IMPACT Clini...</a> | <a href="#">P-0006571-T01-IM5</a> | Head and Neck Squamous Cell Ca... | Missense      | 0.15        |
| R590C          | <a href="#">Colon Adenocarci...</a> | <a href="#">TCGA-CK-4951-01</a>   | Mucinous Adenocarcinoma of the... | Missense      | 0.15        |
| A591T          | <a href="#">Lung Adenocarcin...</a> | <a href="#">TCGA-62-8395-01</a>   | Lung Adenocarcinoma               | Missense      | 0.29        |
| A591V          | <a href="#">Stomach Adenocar...</a> | <a href="#">TCGA-CG-5733-01</a>   | Stomach Adenocarcinoma            | Missense      | 0.37        |
| R593C          | <a href="#">Colon Adenocarci...</a> | <a href="#">TCGA-DM-A28F-01</a>   | Colon Adenocarcinoma              | Missense      | 0.36        |
| R593H          | <a href="#">Colon Adenocarci...</a> | <a href="#">TCGA-CM-4750-01</a>   | Colon Adenocarcinoma              | Missense      | 0.58        |
| G594D          | <a href="#">MSK-IMPACT Clini...</a> | <a href="#">P-0004051-T01-IM5</a> | Colon Adenocarcinoma              | Missense      | 0.29        |
| G594S          | <a href="#">MSK-IMPACT Clini...</a> | <a href="#">P-0001851-T01-IM3</a> | Adrenocortical Carcinoma          | Missense      | 0.49        |
| K601M          | <a href="#">MSK-IMPACT Clini...</a> | <a href="#">P-0009591-T01-IM5</a> | Lung Adenocarcinoma               | Missense      | 0.31        |
| C604Y          | <a href="#">MSK-IMPACT Clini...</a> | <a href="#">P-0001448-T01-IM3</a> | Pleomorphic Liposarcoma           | Missense      | 0.12        |
| E605D          | <a href="#">Recurrent and Me...</a> | <a href="#">P-0000573-T01-IM3</a> | Oral Cavity Squamous Cell Carc... | Missense      | 0.20        |
| L609Q          | <a href="#">MSK-IMPACT Clini...</a> | <a href="#">P-0000226-T01-IM3</a> | Alveolar Rhabdomyosarcoma         | Missense      | 0.44        |
| D610Y          | <a href="#">MSK-IMPACT Clini...</a> | <a href="#">P-0010130-T02-IM5</a> | Small Cell Lung Cancer            | Missense      | 0.27        |
| T613M          | <a href="#">Head and Neck Sq...</a> | <a href="#">TCGA-CV-7097-01</a>   | Head and Neck Squamous Cell Ca... | Missense      | 0.37        |
| L626P          | <a href="#">MSK-IMPACT Clini...</a> | <a href="#">P-0007296-T01-IM5</a> | Colon Adenocarcinoma              | Missense      | 0.37        |
| C637G          | <a href="#">Lung Adenocarcin...</a> | <a href="#">TCGA-69-7974-01</a>   | Lung Adenocarcinoma               | Missense      | 0.06        |
| E646K          | <a href="#">MSK-IMPACT Clini...</a> | <a href="#">P-0000138-T01-IM3</a> | Breast Mixed Ductal and Lobula... | Missense      | 0.28        |

**Supplementary Table 1. DOT1L R2 variants identified in cBioPortal database.** In total, 19 missense variants were observed in cBioPortal (<https://www.cbioportal.org>).

| Primer Name | Sequence                | Tm (°C) |
|-------------|-------------------------|---------|
| DCF01       | CTTGTGGAAAGGACGAAACACCG | 61      |
| CS1_R01     | TGCTAGGACCGCCTTAAAGC    | 61      |

**Supplementary Table 2. Primers for sgRNA sequencing.**

## Supplementary References

- 1 Shi, J. *et al.* Discovery of cancer drug targets by CRISPR-Cas9 screening of protein domains. *Nat Biotechnol* **33**, 661-667, doi:10.1038/nbt.3235 (2015).
- 2 Simossis, V. A. & Heringa, J. PRALINE: a multiple sequence alignment toolbox that integrates homology-extended and secondary structure information. *Nucleic Acids Res* **33**, W289-294, doi:10.1093/nar/gki390 (2005).
- 3 Worden, E. J., Hoffmann, N. A., Hicks, C. W. & Wolberger, C. Mechanism of Cross-talk between H2B Ubiquitination and H3 Methylation by Dot1L. *Cell* **176**, 1490-1501 e1412, doi:10.1016/j.cell.2019.02.002 (2019).
