# Supplementary material for: High-resolution characterization of gene function using single-cell CRISPR tiling screen
Source: PubMed Central journal article supplement (PMC8249386; doi:10.1038/s41467-021-24324-0), 2021-07-01
Supplement: 41467_2021_24324_MOESM5_ESM.pdf [file 41467_2021_24324_MOESM5_ESM.pdf]

**Title: Supplementary Data 1.**

**Description: Sequence of individual sgRNAs in the DOT1L-tiling CRISPR library.** sgRNAs are named as “sg\_mDot11\_(cut position in cDNA)\_(sense/antisense)”.
